# Supplementary material
Source: PubMed Central journal article supplement (PMC423216)
Supplement: plntcell_16_5_1288__1.pdf [file plntcell_16_5_1288__1.pdf]

**Table1. List of oligonucleotides used for RT-PCR analysis.**

| Gene name   | Forward Oligonucleotide   | Reverse Oligonucleotide      | PCR size (bp) |
|-------------|---------------------------|------------------------------|---------------|
| <i>meg1</i> | TGCTGCTCATGCGCATGGGGCTG   | TTAGAAGCAKGCATGWCTACACTSAGCC | 165           |
| <i>meg2</i> | ATGCACATGGGAAGGGTCATGTC   | TTAGAAGCAKGCATGWCTACACTSAGCC | 193           |
| <i>meg3</i> | GCATAGCAGGAGTGGAGGGC      | GAAGCAGGCATGACTACTC          | 292           |
| <i>meg4</i> | TGGCCAATGTCGCCTCCGAG      | TTAGAAGCAKGCATGWCTACACTSAGCC | 320           |
| <i>meg5</i> | ATGGCTGGCTATGGTGTGATG     | GTGCAGTTGCAGGTAAGCCC         | 150           |
| <i>meg6</i> | TGTACGCCTGACTTGGCTAGCAACC | TTAGAAGCAKGCATGWCTACACTSAGCC | 181           |
| <i>gs1</i>  | GCAACGTACCGTACCTTTCCGA    | ACGCTGCATTCAATTACCGGGAAG     | 240           |
| <i>uidA</i> | GGGCCAACAGTTCCTGATTAACCAC | CCCCGTTGACTGCCTCTTCG         | 300           |

**Table2. List of oligonucleotides used in the promoter deletion analysis.**

| Construct Name  | Forward Oligonucleotide        | Reverse Oligonucleotide                   |
|-----------------|--------------------------------|-------------------------------------------|
| pMEG1-GUS       | ACACCTCAAATAGATATGGATATA       | GTTATCTATTCTATTCTATCATATCTATC             |
| pΔ-240:GUS      | GATATAGATATATAGAAGAGATATAGATGG | GTTATCTATTCTATTCTATCATATCTATC             |
| pΔ-210:GUS      | AGATAGATATGATAGAATAGATAGATAAC  | GTTATCTATTCTATTCTATCATATCTATC             |
| pΔ-180:GUS      | ATTTTGTCTAAAGAGACTAAATCACTGC   | GTTATCTATTCTATTCTATCATATCTATC             |
| pΔ-180,-127:GUS | ACACCTCAAATAGATATGGATATA       | CCAATTCAGTGGGTTATCTATTCTATTCTATCATATCTATC |
| pΔ-210,-127:GUS | ACACCTCAAATAGATATGGATATA       | CCAATTCAGTGGCCATCTATATCTTCTATATATCTATATC  |
| pΔ-240,-127:GUS | ACACCTCAAATAGATATGGATATA       | CCAATTCAGTGGCCCCTTGTATATCTATATCTATACC     |
